# Supplementary material
Source: Research Square preprint supplement (doi:10.21203/rs.3.rs-9713570/v1)
Supplement: Supplementary file 1 [file 59780c3db104aa56484e1fd5.docx]

Appendix I. Theoretical Analysis of Labor Reallocation Induced by Environmental Regulatory Disparities

# 一、Theoretical Framework

One of the core objectives of this paper is to examine how labor is reallocated from urban areas to counties in tandem with industrial relocation following the implementation of environmental monitoring networks. Labor mobility decisions are not solely a function of monetary returns, but are also influenced by various non-pecuniary factors, such as job stability, living conditions, and access to public services.

In what follows, we analyze how disparities in environmental regulation affect workers’ overall utility across different regions and sectors, thereby driving spatial reallocation of labor. Consider a representative worker whose level of human capital is denoted by , where , and is distributed according to . The worker faces a two-dimensional employment choice problem defined over regions and sectors. The regional dimension consists of urban areas (U) and counties (C), while the sectoral dimension includes the public sector (B) and the private sector (E).

Accordingly, the worker has four potential employment options: the urban public sector , the urban private sector , the county public sector , and the county private sector . The worker’s objective is to choose the option that yields the highest overall utility.

Environmental regulatory intensity, , is introduced as the key exogenous shock. Its spatial distribution—characterized by “greater concentration in urban areas and relative sparsity in counties”—directly implies that . The impact of regulatory disparities on labor is twofold: it operates indirectly through firms by affecting labor demand and wages, and directly through households by influencing welfare.

An increase in environmental regulatory intensity in urban areas raises firms’ compliance costs. The resulting cost escalation compresses profit margins, which in turn induces firms to scale down production, leading to a reduction in derived labor demand. At the same time, in order to meet regulatory requirements, firms may substitute labor with environmental protection capital (e.g., pollution abatement equipment), further depressing labor demand within the region. The combined effect of these two channels is a decline in the equilibrium wage in the urban private sector, , or an increase in urban unemployment risk.

In contrast, the relatively lax environmental regulatory environment in counties creates a differentiated locational advantage for firms. As firms relocate to counties, they directly stimulate local labor demand. Given that labor supply remains relatively stable in the short run, this increase in demand is likely to push up the equilibrium wage in county labor markets, .

Regions with lower environmental regulatory intensity tend to be associated with more severe local pollution, leading to higher health risks and deteriorating living conditions. We define this as the environmental non-pecuniary cost, , and assume that . This implies that stronger environmental regulation reduces pollution levels and, consequently, lowers the non-pecuniary costs borne by residents. Given that , it follows that .

From the perspective of workers, counties are therefore at a natural disadvantage in terms of environmental amenities, which constitutes a form of “migration friction” that discourages relocation to counties.

To highlight the core role of environmental regulation, we assume that differences between the public and private sectors—such as income and job stability—are exogenously given, and that the level of digital government, , remains fixed at a baseline level. Accordingly, the expected monetary return for a worker in sector and region is denoted by , while the cost of accessing public services is denoted by . Compared with the private sector, the public sector typically enjoys greater convenience in accessing public services.

The worker’s overall utility, , is defined as the expected monetary return net of public service costs and environmental non-pecuniary costs. The baseline utility function is given by:

Given the four potential choices available to workers, we next analyze the utility associated with each of the four cases.

## （一） Urban Public Sector

Here, denotes the expected monetary return for workers in the urban public sector, which is given by a weighted average of the fixed wage and potential rent-seeking income . The parameter represents the share of public employees who face zero moral cost and are willing to engage in rent-seeking activities, while denotes the probability that such activities are detected, and is the probability of successful rent extraction.

The term captures the cost of accessing public services in the urban public sector, which is assumed to be the product of the baseline public service cost and a discount factor . Here, reflects the privileged access and social capital advantages enjoyed by public sector employees, implying that their service access cost is lower than that of the general public.

Given that environmental regulatory intensity is higher in urban areas, the associated environmental non-pecuniary cost is relatively low. Overall, the urban public sector offers stable institutional income, preferential access to public services, and a superior living environment. As a result, the overall utility is typically high, generating a strong “lock-in effect.”

## （二）Urban Private Sector

The utility of workers in the urban private sector consists of their expected monetary returns, public service costs, and environmental costs, taking the following specific form:

In this case, utility is determined by expected monetary income, public service costs, and environmental costs. The wage rate in urban labor markets is denoted by , and represents the worker’s human capital level, implying that earnings are ability-dependent. The parameter captures the stability of the urban economy, reflecting the degree of job and income security; a higher corresponds to more stable expected earnings.

Workers in the private sector incur the full cost of accessing public services, without any preferential discount. Meanwhile, they face the same environmental conditions as their public sector counterparts. implies that utility in the urban private sector depends more strongly on individual ability and market conditions. Although public service costs are relatively high, the favorable environmental conditions partially offset this disadvantage, resulting in greater income variability compared to the public sector.

## （三）County Public Sector

The utility function for the county public sector is analogous to that of the urban public sector and is specified as:

In the county public sector, the wage level is generally lower than . Meanwhile, both the rent-seeking opportunity and the detection probability may differ due to variations in local governance capacity. Although workers in the county public sector also enjoy preferential access to public services, the baseline level of such services is lower, implying .

In addition, weaker environmental regulation in counties leads to higher environmental non-pecuniary costs, i.e., is relatively large. Overall, while the county public sector provides stable income and certain institutional privileges, it is associated with inferior public service provision and living conditions.

## （四）County Private Sector

Under the context of regulatory disparities, the utility function for workers in the county private sector is given by:

Here, denotes the nominal wage rate. Regulatory disparities induce pollution-intensive industries to relocate to counties, thereby increasing local labor demand and exerting upward pressure on . The parameter captures economic stability; in general, counties exhibit weaker economic resilience than urban areas, exposing workers to higher risks of unemployment and income volatility. Moreover, the quality and accessibility of public services in counties are typically inferior to those in urban areas, requiring workers to incur higher time, effort, and monetary costs to meet their basic needs, which further reduces net utility. The utility structure of the county private sector can thus be summarized as follows: it relies on potentially higher nominal wages , driven by industrial relocation, as the primary attraction, in an attempt to compensate for the dual disadvantages in public service provision and environmental quality .

Consequently, labor mobility decisions fundamentally reflect a trade-off. Migration to counties occurs only when the wage premium is sufficiently large to offset the losses associated with poorer public services and environmental conditions. This implies that labor reallocation is inherently selective, favoring workers who are either less sensitive to public service and environmental quality, or whose human capital level is sufficiently high such that their wage gains can fully compensate for these costs.

## （五）Threshold Condition for Labor Reallocation

We now derive the conditions under which labor reallocation occurs. To sharpen the analysis, we focus on the most representative scenario: high-human-capital workers choosing between positions in the urban public sector and the county private sector. This decision essentially reflects a trade-off between “job stability and implicit benefits” and “income flexibility and growth potential,” and mirrors the coexistence of the “civil service examination fever” and labor shortages in the manufacturing sector.

### 1．Benchmark Case: Environmental Regulation without Digital Government Intervention

We begin by considering labor reallocation driven solely by regulatory disparities(), abstracting from digital government intervention. The indifference condition for workers is given by ，Substituting from Equations and , we obtain：

In the baseline period with a low level of digital government development (), rent-seeking costs in the public sector are relatively high, economic stability in counties is weaker than in urban areas, and the gap in public service provision between urban and rural areas is substantial (). Under these conditions, stronger environmental regulation in urban areas implies , which reduces the right-hand side of Equation . At the same time, regulatory disparities induce pollution-intensive firms to relocate to counties, increasing local labor demand and exerting upward pressure on nominal wages in the county private sector, thereby raising . As a result, the net effect of environmental regulation on labor reallocation is theoretically ambiguous.

For low-skilled workers, the increase in nominal wages may be sufficient to offset the rise in environmental costs, thereby inducing migration. In contrast, for high-skilled workers, the high level of institutional rent and superior public service provision in the urban public sector generate a strong “lock-in effect”, making them reluctant to move to the county private sector, even in the presence of deteriorating employment prospects in the urban private sector due to stricter regulation. Consequently, labor reallocation is primarily manifested as the passive following of low-skilled workers, while high-skilled workers may become trapped in a “preference for the urban public sector.”

### 2.The Coordinating Effect of Digital Government

In the benchmark case, the coordinating effect of digital government is not taken into account. As digital government develops—through mechanisms such as open government data and interdepartmental data integration—it strengthens regulatory accountability. We now introduce digital government (i.e., an increase in ) and examine how it alters the equilibrium in the baseline setting. Expanding Equation , we obtain:

Equation determines the threshold level of human capital at which workers are indifferent between the urban public sector and the county private sector, denoted as (hereafter simplified as ). Workers with human capital above this threshold choose the county private sector, while those below it prefer the urban public sector. Our objective is to characterize how digital government affects this threshold. Based on institutional realities, we assume that parameters such as , , , , and remain constant in the short run. Under this assumption, Equation can be rewritten as：

Applying the implicit function theorem, we have:, Note that,Since and ,it follows that: We therefore focus on the components of and their respective signs.

Equation can be decomposed into three components: rent-seeking suppression, public service improvement, and economic stabilization. For the first component, given that , and it follows that: This term captures the effect of digital government in strengthening supervision over the urban public sector, thereby reducing expected rent-seeking income. This, in turn, weakens the attractiveness of the urban public sector and lowers the psychological barrier for workers to exit. For the second component in Equation , note that, and . Therefore, the sign of this term depends on the relative magnitude of the reduction in public service costs across urban and county areas. A reasonable assumption is that digital government has a stronger marginal effect on “low-level” regions (counties) than on “high-level” regions (urban areas), that is:. Under this assumption, ，which indicates that digital government, by equalizing public service provision, reduces the overall cost of living and working in counties, while simultaneously weakening the preferential advantage of public sector employees in accessing such services. For the third component, since and , digital government enhances the stability of the county economy and directly increases expected income in the county private sector. Overall, two components of are negative, while one is positive, making the sign of not immediately apparent. To determine the net effect, we turn to China’s institutional context.

First, under stringent environmental policies guided by dual objectives, regulatory instruments such as environmental taxes, emission standards, and inspection systems have significantly increased firms’ compliance costs and operational pressures, generating strong and immediate negative effects.

Second, environmental regulation may induce positive effects such as technological innovation—consistent with the Porter hypothesis—but in the early and intermediate stages of China’s economic transformation, such effects tend to exhibit substantial lag and sectoral imbalance. In other words, these benefits are concentrated in a limited number of advanced green industries, while for traditional industrial sectors, which still account for a significant share, short-term gains are insufficient to offset rising costs.

Moreover, the regulatory process is often accompanied by tighter financing constraints, resource reallocation, and, in some cases, administrative interventions, which further reinforce the negative effects by suppressing investment and production activities.

Taken together, the negative effects—characterized by greater intensity and more direct impact—dominate the positive effects, which are more limited in scope and slower to materialize. As a result, the net effect is significantly negative, implying that: . Accordingly, we obtain: . which indicates that, with the advancement of digital government, the threshold level of human capital declines. Workers whose human capital levels fall within the interval, who would have chosen to remain in the urban public sector prior to digital government development, now find the county private sector more attractive.

Overall, digital government reduces the human capital threshold required for workers to select the county private sector by suppressing rent-seeking, enhancing economic stability, and improving public service provision. This, in turn, strengthens the spatial reallocation of labor induced by environmental regulatory disparities and contributes to a more efficient allocation of human capital.

Appendix II. The Impact of Environmental Monitoring Network Implementation on Labor Mobility

From a micro-level perspective based on the Beckerian framework, labor mobility can be viewed as a form of human capital investment. When individuals decide which city to migrate to, they form expectations based on factors such as career development opportunities, family conditions, and urban growth prospects. The choice of destination is made to maximize individual utility. Accordingly, the utility function of labor mobility can be specified as:

Here, denotes an individual worker, represents the destination district or county chosen by the individual, denotes the city to which district belongs, and indexes time. represents the utility that individual obtains from choosing destination at time . measures the regulatory intensity of city where destination is located. denotes expected income in the destination, where expected income in urban areas is proxied by the average disposable income of urban residents, and that in rural areas is proxied by the average disposable income of rural residents. is a vector of regional control variables, while captures individual characteristics, including gender, ethnicity, household registration (hukou) status, age, marital status, and educational attainment. , , and denote district fixed effects, time fixed effects, and the idiosyncratic error term, respectively.

The individual’s migration decision follows the rule:

Where is a binary indicator, and individuals choose the destination that maximizes expected utility. Based on this framework, a conditional Logit model is employed to estimate the probability that an individual chooses a given destination:

The sign of the estimated coefficient with respect to regulatory intensity reflects whether environmental regulation exerts a dispersing or agglomerating effect on labor inflows. A negative coefficient indicates that higher regulatory intensity discourages labor inflows, implying that stronger regulation reduces the probability that individuals choose to migrate into the corresponding region.

Tab 1reports that the impact of environmental regulatory intensity on labor inflows exhibits a dynamic transition pattern. The coefficient for 2014 is significantly positive, suggesting that environmental regulation had not yet imposed binding constraints at that time. Instead, the advantages of public services and employment security in highly regulated regions still dominated. From 2015 to 2017, the estimated coefficients turn significantly negative, providing empirical support for the crowding-out effect of environmental regulation on labor inflows.

With respect to control variables, labor inflow decisions reflect a multidimensional trade-off among factors such as the level of urbanization, public service provision, and industrial structure. The effect of urbanization is negative in 2014–2015, indicating that although highly urbanized regions (urban areas) possessed stronger economic fundamentals at this stage, the strengthening of environmental regulation and rising living costs partially offset their attractiveness to labor.

In 2016, the coefficient becomes positive (0.0024) and is statistically significant at the 1% level; although the estimate for 2017 is not statistically significant, it remains positive. This pattern suggests that, as industries relocate toward counties, the urbanization process in some counties accelerates, accompanied by gradual improvements in infrastructure and employment opportunities. Consequently, the positive attraction effect of urbanization on labor inflows begins to emerge.

Finally, the effect of welfare levels remains significantly positive throughout, highlighting the importance of non-pecuniary benefits in labor mobility decisions.

Tab 1 Dynamic Effects of Environmental Regulation on Labor Inflow Decisions

| Variable | 2014 | 2015 | 2016 | 2017 |
| --- | --- | --- | --- | --- |
| Environmental Regulatory Intensity | 0.0344*** | -0.0777*** | -0.8731*** | -0.7395*** |
| (4.034) | (-7.168) | (-12.256) | (-7.343) |
| ur | -0.0067*** | -0.0024*** | 0.0024*** | 0.0004 |
| (-13.305) | (-4.782) | (4.048) | (0.566) |
| hospital | -0.1087*** | 0.0005 | -0.0861*** | -0.0646*** |
| (-15.041) | (0.066) | (-10.312) | (-7.463) |
| welfare | -0.0275*** | 0.0815*** | 0.0320*** | 0.0269*** |
| (-5.096) | (12.048) | (4.116) | (2.918) |
| fin_pre | 0.2889*** | -0.1148*** | -0.0005 | 0.1813*** |
| (11.626) | (-4.454) | (-0.018) | (6.635) |
| sec_ind | -0.0070*** | -0.0017** | -0.0065*** | -0.0000 |
| (-8.316) | (-1.980) | (-7.351) | (-0.047) |
| ter_ind | -0.0096*** | 0.0072*** | -0.0023** | -0.0011 |
| (-9.901) | (7.935) | (-2.466) | (-1.221) |
| population | 0.1616*** | 0.0212 | 0.1527*** | 0.0901*** |
| (11.086) | (1.479) | (9.559) | (5.388) |
| finance | -0.0232 | -0.1461*** | 0.1045*** | 0.1307*** |
| (-1.432) | (-9.391) | (7.191) | (11.276) |
| Observations | 11249874 | 12031248 | 8641404 | 8382738 |
| Pseudo R-squared | 0.0026 | 0.0022 | 0.0027 | 0.0016 |

**Note:** t-statistics are reported in parentheses. *, **, and *** denote statistical significance at the 10%, 5%, and 1% levels, respectively. The same applies below.

Age is a key individual characteristic influencing labor mobility decisions (Zhang, 2025). Differences across age groups in terms of family responsibilities, career aspirations, and risk preferences lead to heterogeneous responses to disparities in environmental regulation. Tab 2 divides the sample into three groups—young, middle-aged, and older workers—and reveals clear generational differences in labor mobility in China. The young group exhibits the highest sensitivity to environmental regulation: the coefficients of regulatory intensity are significantly negative during 2015–2017, with larger magnitudes than those for the middle-aged and older groups.

This pattern is consistent with the characteristics of young workers in China. Young individuals typically face lighter family burdens and enjoy greater occupational mobility, making them more inclined to pursue employment opportunities with higher income and fewer constraints. Following the intensification of environmental inspections after 2015, recruitment in traditional urban industries contracted, while emerging industries in counties offered more attractive job opportunities. As a result, young workers were the first to respond to regulatory disparities by migrating toward counties.

In contrast, middle-aged workers are generally in a more stable stage of their careers, and the absolute values of the coefficients are smaller than those of the young group. This may reflect path dependence in career trajectories and family-related constraints. Specifically, the social networks, skills, and accumulated resources that middle-aged workers have built in urban areas are not easily transferable, making them more cautious in responding to regulatory shocks. Migration decisions are therefore more likely to occur only when employment opportunities in counties become sufficiently certain.

Older workers show little to no response to environmental regulation, which aligns with their employment characteristics in China. They are more likely to be engaged in low-skilled jobs with lower stability requirements and are less sensitive to industrial contraction induced by environmental regulation. Moreover, older individuals place greater importance on access to healthcare and elderly services. Given the relatively lower level of public service provision in counties, their willingness to migrate remains limited, and thus regulatory intensity has a negligible effect on their mobility decisions.

Tab 2 The Impact of Environmental Regulation on Labor Inflow Decisions across Age Groups

| Variable | 2015 | | | 2016 | | | 2017 | | |
| --- | --- | --- | --- | --- | --- | --- | --- | --- | --- |
| Young | Mid-aged | Older | Young | Mid-aged | Older | Young | Mid-aged | Older |
| Regulatory Intensity | -0.0921*** | -0.0638*** | 0.0631 | -0.9506*** | -0.7375*** | -1.2570* | -0.7986*** | -0.5968*** | -16.0034 |
| | (-6.474) | (-3.684) | (0.838) | | --- | --- | --- | | | (-3.684) | (-3.684) | (0.838) | | --- | --- | --- | | | (-0.838) | (-3.684) | (0.838) | | --- | --- | --- | | (-6.041) | (-3.836) | (-0.010) | (-6.041) | (-3.836) | (-0.010) |
| Controls | Yes | Yes | Yes | Yes | Yes | Yes | Yes | Yes | Yes |
| observation | 7409832 | 4452216 | 132540 | 5417793 | 3088287 | 105789 | 5158608 | 3056508 | 138138 |
| Pseudo R2 | 0.0025 | 0.0020 | 0.0114 | 0.0028 | 0.0025 | 0.0091 | 0.0019 | 0.0012 | 0.0093 |
| Log-Likelihood | -83023.457 | -49907.643 | -1471.7044 | -63238.941 | -36059.218 | -1227.0919 | -59432.555 | -35238.693 | -1579.768 |

Among various motives for labor mobility, migration for work and business is the most directly driven by employment opportunities and exhibits the strongest linkage with industrial relocation. To further verify the “employment-following” effect associated with industrial transfer, this study focuses specifically on the subgroup of individuals whose primary migration motive is work and business[[1]](#footnote-0). Tab 3 show that the coefficients of environmental regulatory intensity are significantly negative during 2015–2017, with magnitudes larger than those estimated for the full sample in Tab 1 This pattern arises because labor engaged in work- and business-related migration is almost entirely motivated by income and employment opportunities.

Following the tightening of environmental policies after 2015, high energy-consuming and labor-intensive industries in urban areas began to relocate to counties. In response, this group of workers migrated to counties in pursuit of employment opportunities, giving rise to a clear “jobs-follow-industry” dynamic.

Notably, the coefficient of environmental regulatory intensity turns from positive to negative in 2015, and its magnitude increases substantially in 2016. This reflects the binding and rigid enforcement of environmental regulations in China. After the revised Environmental Protection Law came into effect in 2015, urban governments significantly intensified the regulation of polluting firms, prompting a large number of enterprises to relocate to counties in the short run. To avoid unemployment, workers engaged in work and business activities responded rapidly to these shifts in regional employment opportunities, demonstrating a survival-driven mobility pattern.

These findings help explain the observed synchrony between population return flows and industrial agglomeration in Chinese counties. The inflow of work- and business-oriented labor provides an adequate labor supply for counties undertaking industrial relocation, while the expansion of county-level industries further attracts additional labor inflows, generating a virtuous cycle. This dynamic constitutes an important driving force behind the accelerated urbanization of counties in central and western China in recent years.

Tab 3 Dynamic Effects of Environmental Regulation on Labor Inflows: Work- and Business-related Migration

| Variable | 2014 | 2015 | 2016 | 2017 |
| --- | --- | --- | --- | --- |
| Regulatory Intensity | 0.0517*** | -0.0951*** | -1.3720*** | -0.8964*** |
| (5.570) | (-7.656) | (-11.639) | (-6.486) |
| Controls | Yes | Yes | Yes | Yes |
| observation | 9191904 | 9753816 | 5136942 | 5114928 |
| Pseudo R2 | 0.0031 | 0.0024 | 0.0035 | 0.0021 |
| Log-Likelihood | -106271.32 | -109290.77 | -59923.565 | -58919.746 |

Human capital plays a crucial role in shaping workers’ skill adaptability and occupational choice sets (Zhu and Fan, 2025), thereby influencing how individuals perceive and respond to changes in regional employment environments. Tab 4 to Tab 7 classify the sample by educational attainment and reveal how the match between human capital and regional employment opportunities evolves in China.

Workers with low levels of education (primary school or below) are predominantly engaged in manual labor. Although they exhibit high mobility, their limited access to information constrains their ability to respond promptly to changes in employment opportunities. In the early stage of tightened environmental regulation in 2015, their response is not statistically significant, likely due to delayed perception of regional labor market shifts. In 2016, as industrial relocation to counties entered a more large-scale phase and job opportunities became more explicit, their migration response became evident. However, the coefficient becomes insignificant again in 2017, possibly because some low-educated workers, after moving to counties, returned to urban areas due to inadequate public services or unmet income expectations. This pattern reflects the relatively blind and reversible nature of migration among low-educated workers.

Workers with medium levels of education (junior and senior high school) constitute the backbone of China’s manufacturing and service sectors (Cui, 2025), and their mobility patterns closely align with industrial relocation. Their skills—such as assembly-line operations and basic managerial capabilities—are highly compatible with the types of industries relocating to counties, including electronics assembly and textile and garment production. Following the contraction of traditional industries in urban areas after 2015, these workers faced a dual constraint: difficulty in entering high-end service sectors and reluctance to engage in low-paid informal jobs. In contrast, county-level industries offered positions characterized by skill matching and relatively stable income, making them the optimal choice for this group.

For highly educated workers, the advancement of environmental regulation has been accompanied by rising skill requirements in high-tech industries, making it difficult for some to fully match urban labor market demands. At the same time, industrial relocation to counties has generated new demand for managerial and technical positions, providing alternative channels for value realization. In addition, the development of digital government—such as e-governance and remote working arrangements—has reduced information barriers for highly educated workers seeking employment in counties, further facilitating their migration.

Overall, the results in Tab 4 to Tab 7 provide empirical support for the trend of “talent downshifting” in China, whereby highly educated workers increasingly migrate to county-level areas. This trend helps alleviate talent shortages in counties and provides intellectual support for industrial upgrading. It is also closely aligned with China’s national strategies of rural revitalization and high-quality development of the county-level economy.

Tab 4 The Impact of Environmental Regulation on Labor Inflow Decisions by Educational Attainment, 2014

| Variable | Primary School and Below | Junior High School | Senior High School | College and Above |
| --- | --- | --- | --- | --- |
| Regulatory Intensity | -0.0395 | 0.0060 | 0.1228*** | 0.0484** |
| (-1.515) | (0.493) | (7.224) | (2.253) |
| Controls | Yes | Yes | Yes | Yes |
| observation | 1373247 | 5874717 | 2423409 | 1578501 |
| Pseudo R2 | 0.0035 | 0.0031 | 0.0034 | 0.0024 |
| Log-Likelihood | -15870.129 | -67919.944 | -28008.836 | -18261.678 |

Tab 5 The Impact of Environmental Regulation on Labor Inflow Decisions by Educational Attainment, 2015

| Variable | Primary School and Below | Junior High School | Senior High School | College and Above |
| --- | --- | --- | --- | --- |
| Regulatory Intensity | -0.0540* | -0.0655*** | -0.1100*** | -0.0885*** |
| (-1.866) | (-4.246) | (-4.686) | (-3.180) |
| Controls | Yes | Yes | Yes | Yes |
| observation | 1529568 | 5954712 | 2827896 | 1719072 |
| Pseudo R2 | 0.0029 | 0.0021 | 0.0033 | 0.0040 |
| Log-Likelihood | -17131.256 | -66747.886 | -31659.533 | -19231.94 |

Tab 6 The Impact of Environmental Regulation on Labor Inflow Decisions by Educational Attainment, 2016

| Variable | Primary School and Below | Junior High School | Senior High School | College and Above |
| --- | --- | --- | --- | --- |
| Regulatory Intensity | -0.4148** | -0.8472*** | -1.0822*** | -1.0384*** |
| (-2.321) | (-8.112) | (-6.951) | (-5.942) |
| Controls | Yes | Yes | Yes | Yes |
| observation | 987006 | 3980244 | 2081949 | 1592205 |
| Pseudo R2 | 0.0031 | 0.0021 | 0.0059 | 0.0051 |
| Log-Likelihood | -11517.58 | -46495.828 | -24226.697 | -18543.56 |

Tab 7 The Impact of Environmental Regulation on Labor Inflow Decisions by Educational Attainment, 2017

| Variable | Primary School and Below | Junior High School | Senior High School | College and Above |
| --- | --- | --- | --- | --- |
| Regulatory Intensity | -0.2278 | -0.6386*** | -0.7540*** | -1.6398*** |
| (-1.080) | (-4.298) | (-3.513) | (-4.905) |
| Controls | Yes | Yes | Yes | Yes |
| observation | 1142778 | 3575754 | 1880970 | 1783236 |
| Pseudo R2 | 0.0015 | 0.0011 | 0.0020 | 0.0048 |
| Log-Likelihood | -13172.116 | -41231.063 | -21669.989 | -20486.306 |

Appendix III: Analysis of Bacon Decomposition Results

| 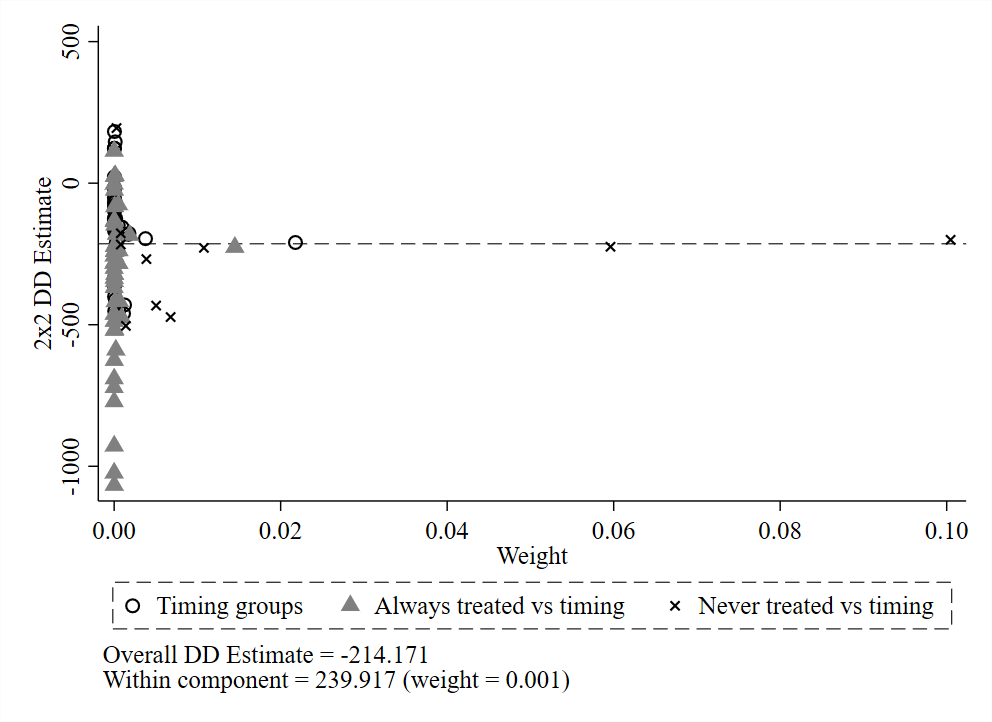Figure 1: Bacon Decomposition Results for Urban Labor |
| --- |

| 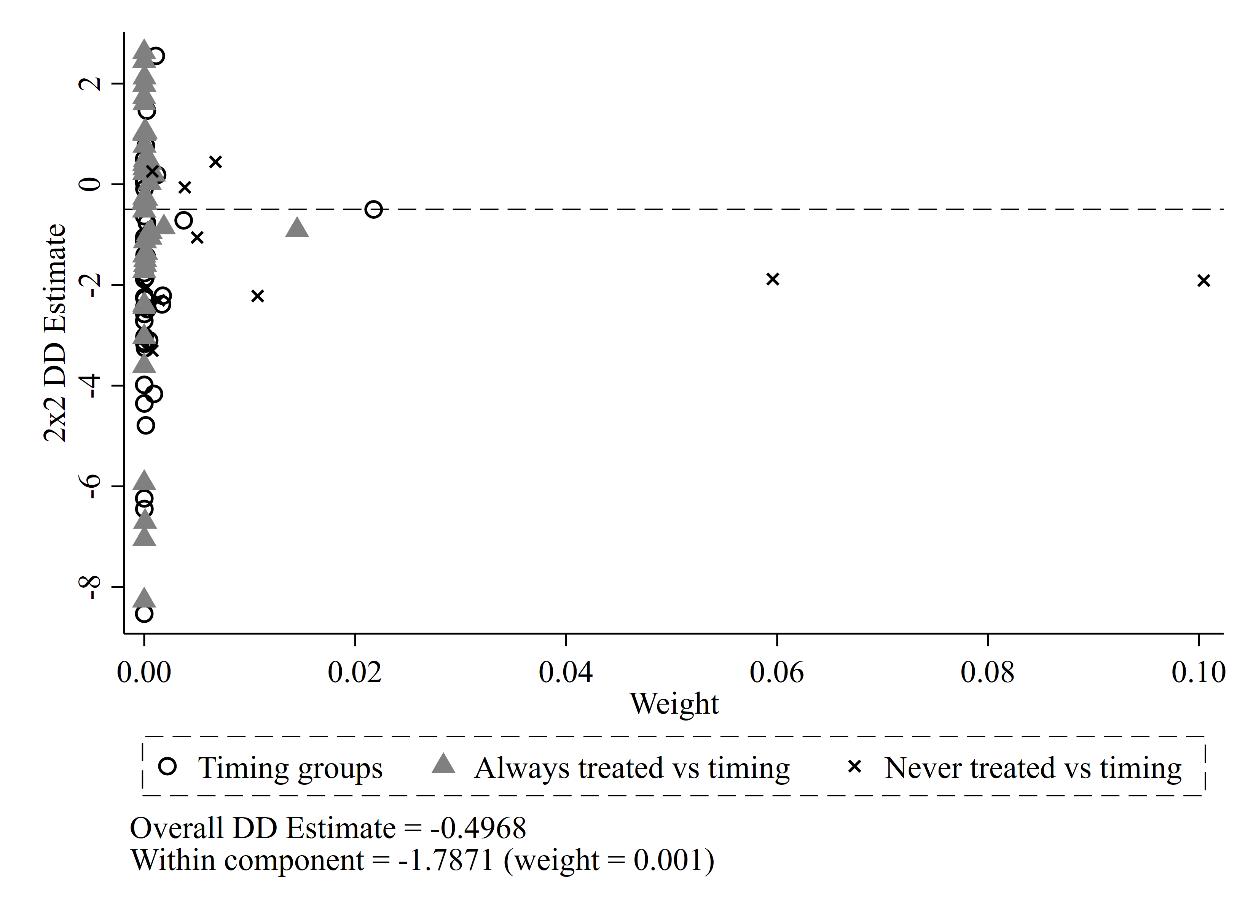Figure 2: Bacon Decomposition Results for Urban Industrial Enterprises |
| --- |

| 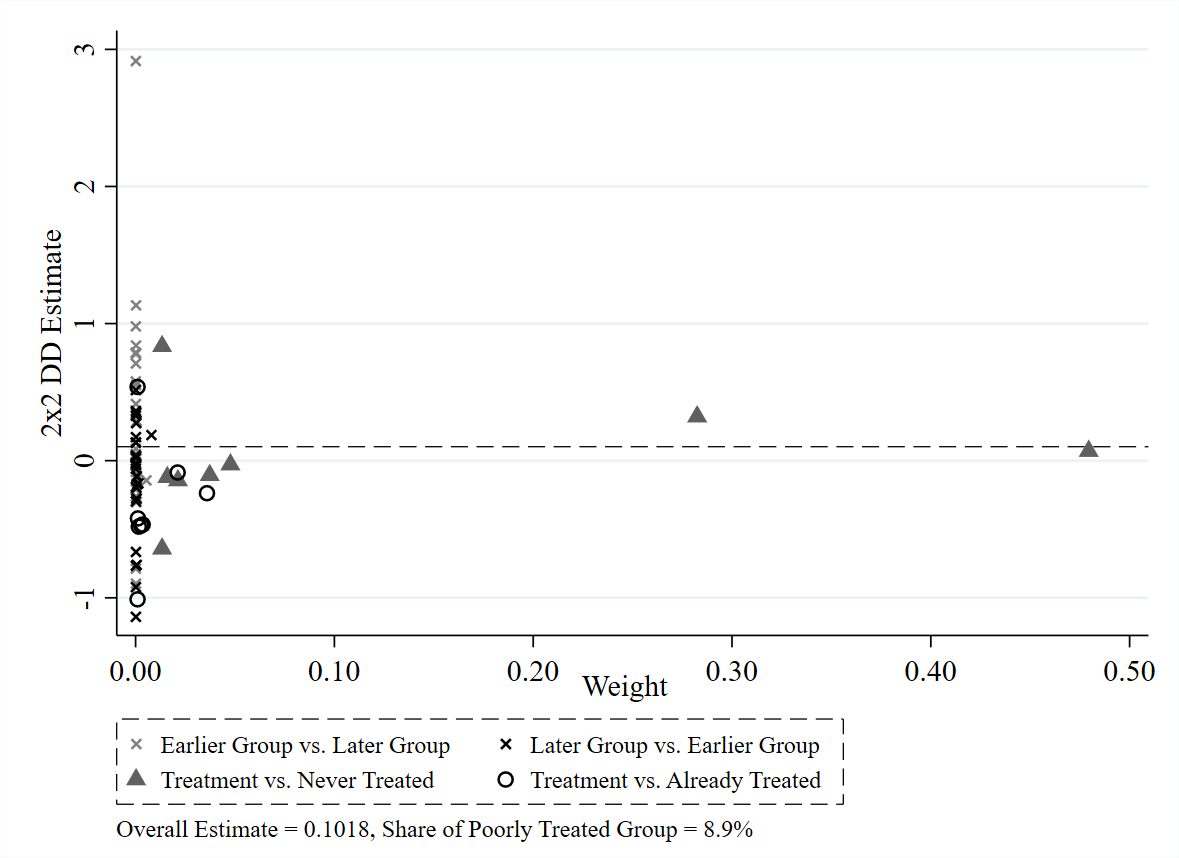Figure 3: Bacon Decomposition Results for County Labor |
| --- |

| 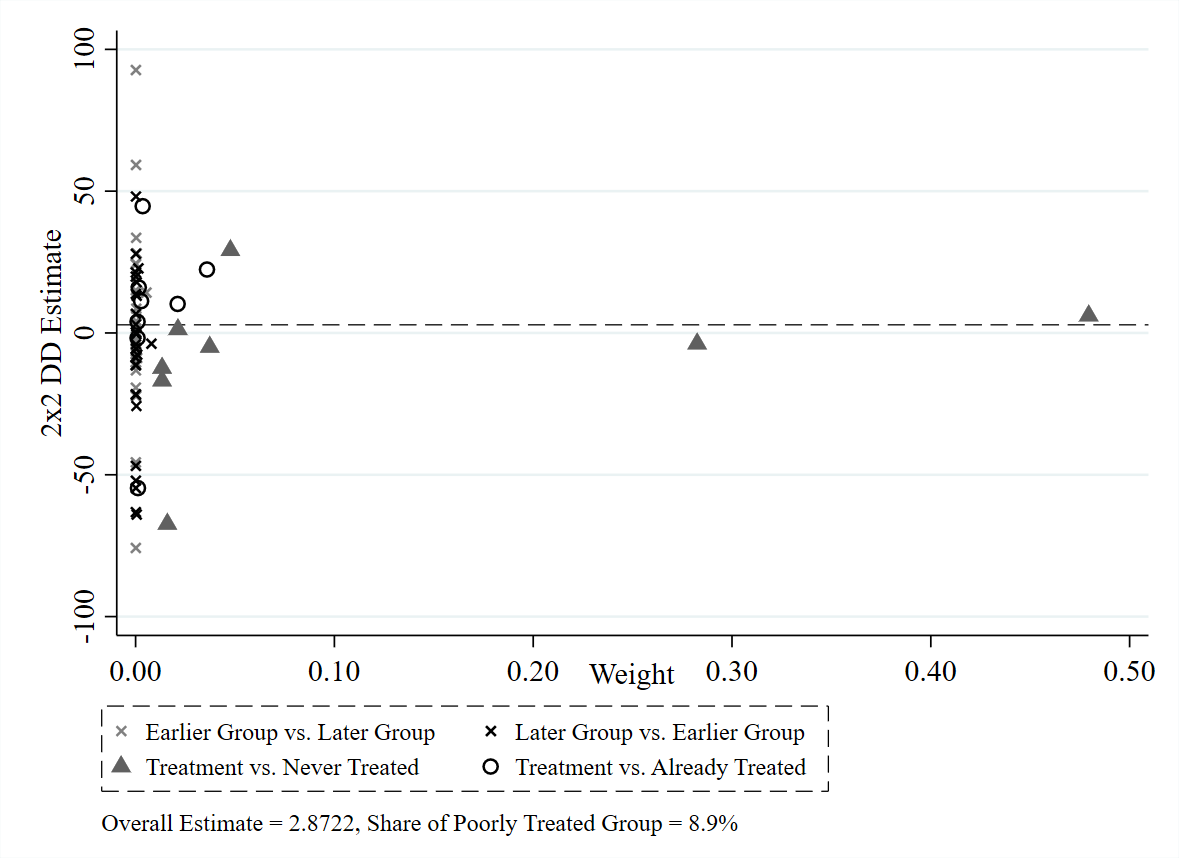Figure 3: Bacon Decomposition Results for County Industrial Enterprises |
| --- |

# References

1. Zhang, W. (2025). Urban talent attraction policies and the mobility of high-skilled labor. *Statistical Research*, 42(6), 122–134.
2. Zhu, S., & Fan, C. (2025). The common prosperity effect of declining household credit costs: A theoretical analysis from the perspective of human capital investment. *Economic Issues*, (11), 59–70.
3. Cui, Y. (2025). Changes in labor skill structure in the process of Chinese-style modernization. *Journal of Beijing University of Technology (Social Sciences Edition)*, 25(2), 29–48.

1. The data capture multiple motivations for migration, primarily including employment-related migration (work and business), marriage-related migration, family reunification, relocation due to housing demolition, birth-related mobility, and retirement migration across regions. [↑](#footnote-ref-0)
